1 **Single-cell dynamics of pannexin-1-facilitated programmed ATP loss during**  
2 **apoptosis**

3  
4 **Hiromi Imamura<sup>a,#,\*</sup>, Shuichiro Sakamoto<sup>a,#</sup>, Tomoki Yoshida<sup>a</sup>, Yusuke Matsui<sup>b</sup>,**  
5 **Silvia Penuela<sup>c</sup>, Dale W. Laird<sup>c</sup>, Shin Mizukami<sup>d</sup>, Kazuya Kikuchi<sup>b</sup>, and Akira**  
6 **Kakizuka<sup>a</sup>**

7  
8 <sup>a</sup>Graduate School of Biostudies, Kyoto University, Kyoto 606-8501, Japan

9 <sup>b</sup>Graduate School of Engineering, Osaka University, Suita, Osaka 565-0871, Japan

10 <sup>c</sup>Department of Anatomy and Cell Biology, Schulich School of Medicine and Dentistry, University  
11 of Western Ontario, London Ontario N6A 5C1, Canada

12 <sup>d</sup>Institute of Multidisciplinary Research for Advanced Materials, Tohoku University, Sendai,  
13 Miyagi 980-8577, Japan

14 #These authors contribute equally to this work.

15 \*Corresponding author: [imamura@lif.kyoto-u.ac.jp](mailto:imamura@lif.kyoto-u.ac.jp)

16  
17 **Abstract**

18 ATP is essential for all living cells. However, how dead cells lose ATP has not been well  
19 investigated. In this study, we developed new FRET biosensors for dual imaging of  
20 intracellular ATP level and caspase-3 activity in single apoptotic cultured human cells.  
21 We show that the cytosolic ATP level starts to decrease immediately after the activation  
22 of caspase-3, and this process is completed typically within 2 hours. The ATP decrease  
23 was facilitated by caspase-dependent cleavage of the plasma membrane channel  
24 pannexin-1, indicating that the intracellular decrease of the apoptotic cell is a  
25 “programmed” process. Apoptotic cells deficient of pannexin-1 sustained the ability to  
26 produce ATP through glycolysis and to consume ATP, and did not stop wasting glucose  
27 much longer period than normal apoptotic cells. Thus, the pannexin-1 plays a role in  
28 arresting the metabolic activity of dead apoptotic cells, most likely through facilitating  
29 the loss of intracellular ATP. (148 words)

30  
31  
32 **Key words**

33 Cell death, apoptosis, ATP, pannexin-1, glycolysis, FRET, biosensor, imaging

34

35

## Introduction

36

37

38

39

40

41

42

43

44

45

Living cells require energy that is provided by the principal intracellular energy carrier, adenosine-triphosphate (ATP). Free energy from ATP that is released upon hydrolysis is utilized in various vital processes including the generation and maintenance of the plasma membrane potential (Kaplan, 2003), remodeling of chromatin (Vignali et al., 2000), locomotion of molecular motors (Vale, 2003), protein degradation (Ciechanover, 1994), and metabolic reactions (Voet and Voet, 2010). Therefore, living cells must maintain high concentrations of intracellular ATP by continuously regenerating ATP from its hydrolysis products, adenosine-diphosphate (ADP) and phosphate ion, via energy metabolism that uses chemical energy stored in cellular nutrients, such as glucose. On the other hand, dead cells contain very little, or even no ATP.

46

47

48

49

50

51

52

53

54

55

Apoptosis is a form of programmed cell death, with important roles in development, tissue homeostasis, and immunity. It is characterized by distinctive morphological changes, such as membrane blebbing, nuclear condensation, and externalization of phosphatidylserine (Elmore, 2016). Although there are a variety of stimuli that can provoke apoptosis, these stimuli converge into the activation of a proteolytic cascade of cysteine proteases, called caspases. Because cleavage of specific target proteins by activated effector caspases triggers apoptotic events, including the characteristic morphological changes, apoptotic cell death is a systematically and genetically determined, or “programmed”, process. In contrast, necrosis is considered to be the “unprogrammed”, cataclysmic demise of the cell.

56

57

58

59

60

61

62

63

64

65

66

It has been reported that cells die from necrosis rather than apoptosis when intracellular ATP is depleted prior to otherwise apoptotic stimuli (Eguchi et al., 1997; Leist et al., 1997). It has been also reported that dATP/ATP is required for the formation of cytochrome c/Apaf-1/procaspase-9 complexes (Hu et al., 1999; Li et al., 1997). Moreover, it is suggested that ATP is required for chromatin condensation of apoptotic cells (Kass et al., 1996). Apoptosis is, thus, considered to be an energy-demanding process, requiring intracellular ATP for the execution of the cell death program. In spite of, or perhaps in part due to the requirement of ATP for apoptosis, the intracellular ATP in apoptotic cells is ultimately depleted. Therefore, it seems likely that both maintenance and reduction of the intracellular ATP level are systematically regulated during the progression of apoptosis. Intracellular ATP levels have been conventionally analyzed with

67 the firefly luciferin-luciferase system (Lundin and Thore, 1975), liquid chromatography  
68 (Sellevold et al., 1986), or related methods, which use lysates of a large number of cells.  
69 Because apoptosis progresses differently between cells (for example see (Matsuyama et  
70 al., 2000)), even those cultured and stimulated in identical conditions, it has been quite  
71 difficult to precisely understand the dynamics of the intracellular ATP level in each dying  
72 apoptotic cell, and difficult to tell whether the ATP decrease accompanies specific  
73 apoptotic events. Furthermore, the molecular mechanism of how intracellular ATP  
74 decreases in apoptotic cells also remains to be elucidated. In addition, it is totally unclear  
75 whether the depleted intracellular ATP in an apoptotic cell benefits the dying cell itself or  
76 the surrounding, healthy cells.

77 In this work, we established a method for imaging both ATP concentration and  
78 caspase-3 activity in a single apoptotic cell with newly developed genetically encoded  
79 Förster resonance energy transfer (FRET)-based biosensors for ATP and caspase-3  
80 activity. We found that the intracellular ATP level starts to decrease following the  
81 activation of caspase-3 and that the caspase-triggered opening of the plasma membrane  
82 channel pannexin-1 (PANX1) is the major cause of the decrease in intracellular ATP.

83

84

85

## Results

### 86 **Development of FRET biosensors for dual imaging of ATP and caspase-3 activity of** 87 **apoptotic cells.**

88 In general, the progression of apoptosis varies between individual cells, even in the same  
89 cell type. It is, thus, essentially difficult to understand how the intracellular ATP level in  
90 a particular cell changes during apoptosis using conventional biochemical analyses of  
91 pooled cells, such as firefly luciferase assays. To reveal the dynamics of intracellular ATP  
92 levels during apoptosis at the single-cell level, we first used a genetically encoded FRET-  
93 based ATP biosensor, ATeam (Imamura et al., 2009), which is comprised of a cyan  
94 fluorescent protein (CFP; mseCFP), an F<sub>0</sub>F<sub>1</sub>-ATP synthase  $\epsilon$  subunit and yellow  
95 fluorescent protein (YFP; cp173-mVenus). Unfortunately, we found that the original  
96 ATeam (AT1.03) was cleaved into its constituent pair of separate fluorescent proteins in  
97 apoptotic cells, most probably by activated caspases (Figure S1). Thus, the FRET signals  
98 of the original biosensor were reduced in apoptotic cells irrespective of the ATP  
99 concentration. We replaced Asp-242 and Asp-339 of AT1.03, which we predicted were

100 within the target sequences of the caspases, with Asn and Gly, respectively, and found  
101 that the altered ATeam was not cleaved inside apoptotic cells (Figure S1). We  
102 subsequently used this caspase-resistant ATeam (AT1.03CR) to study the ATP dynamics  
103 in apoptotic cells.

104 The dynamics of cytosolic ATP levels throughout the apoptotic process were investigated  
105 by imaging single human cervical adenocarcinoma (HeLa) cells expressing AT1.03CR.  
106 Overall, the intracellular ATP levels remained almost constant for several hours after  
107 stimulation. The cytosolic ATP levels in these cells started to decrease after a variable  
108 time interval (typically from 3 to 8 hours after apoptotic stimulation, see Figure S2). Once  
109 the intracellular ATP levels started to decrease, they were depleted within typically 0.5 –  
110 2 hours.

111

112 The presence of a pan-caspase inhibitor zVAD-fmk almost completely blocked the  
113 cytosolic ATP decrease of anti-FAS-induced apoptotic cells (Figure 1A). Thus, the ATP  
114 decrease induced by apoptotic stimuli is most likely a caspase-dependent process. Next,  
115 we developed a FRET-based caspase-3 biosensor O-DEVD-FR by connecting an orange  
116 fluorescent protein mKOκ (Tsutsui et al., 2008) and a far-red fluorescent protein mKate2  
117 (Shcherbo et al., 2009) by a Gly-Gly-Asp-Glu-Val-Asp-Gly-Thr linker containing a *bona*  
118 *fide* caspase-3 recognition sequence (Figure S3). Once caspase-3 is activated, it cleaves  
119 the linker in O-DEVD-FR, resulting in the separation of mKOκ and mKate2, and the  
120 consequent reduction in FRET signal in apoptotic cells (Figure 1B). It was recently  
121 demonstrated that mKOκ-mKate2 FRET pair is compatible with CFP-YFP FRET pair  
122 because they use different spectral windows (Watabe et al., 2020). Thus, it is possible to  
123 use both biosensors to fluorescently image ATP level and caspase-3 activity in the same  
124 apoptotic cell (Figure 1C, D). Activation of caspase-3 was clearly observed as a decrease  
125 in FRET signal (an increase in mKO/mKate ratio). We defined onset of caspase-3  
126 activation as the frame immediately preceding the first frame in which the increase in  
127 mKO/mKate ratio was first observed (see an arrow in the inset of Figure 1D). It was  
128 observed that intracellular ATP started to decrease after the onset of caspase-3 activation,  
129 also supporting that the ATP decrease of the apoptotic cell is a caspase-dependent process.  
130 It should be noted that any increase or decrease in fluorescence intensity due to cell  
131 morphological change was offset because we monitored the ratios of fluorescence  
132 intensities of an acceptor and a donor of the FRET biosensors.

133

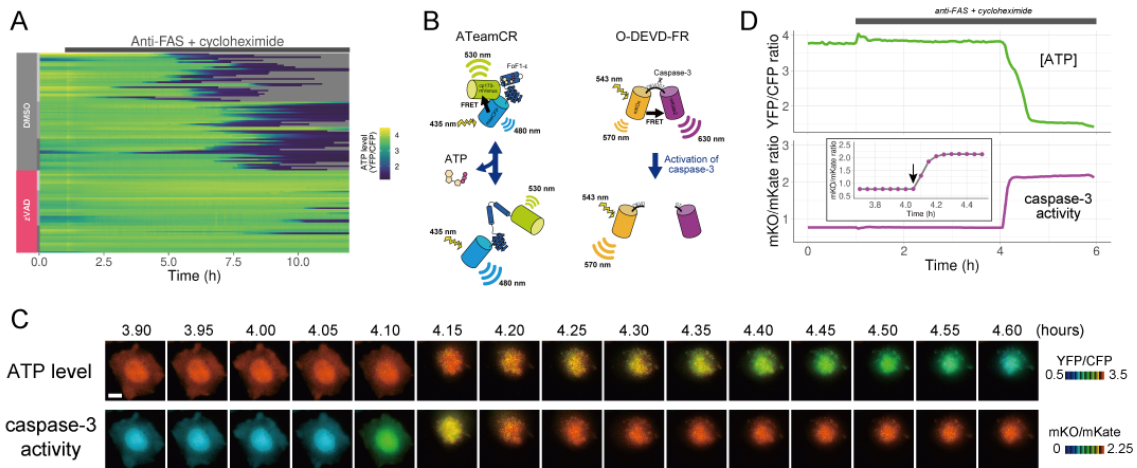

134

135

136

137

138

139

140

141

142

143

144

145

146

147

148

149

### Single-cell dynamics of cytosolic ATP of apoptotic PANX1-knockout cells.

150

151

152

153

154

155

156

157

PANX1 belongs to the innexin/pannexin superfamily and forms a heptameric pore in the plasma membrane (Deng et al., 2020; Michalski et al., 2020; Qu et al., 2020), functioning as a large-pore channel capable of passing small molecules (Bao et al., 2004; Dahl and Muller, 2014; Panchin et al., 2000; Penuela et al., 2013). It has been reported that apoptotic cells release ATP, AMP, and also UTP through the PANX1 channel as “find-me” signals to attract macrophages and that the PANX1 channel is opened by caspase-3/7, which cleaves the C-terminal region of the channel (Chekeni et al., 2010; Elliott et al., 2009; Yamaguchi et al., 2014). The previous cell population-based study has reported

158 that accumulation of extracellular adenine nucleotides correlates with decreases in  
159 intracellular ATP during the apoptotic progression of Jurkat cells (Boyd-Tressler et al.,  
160 2014). In order to investigate the impact of PANX1 on intracellular ATP dynamics during  
161 apoptosis at a single-cell level with high temporal resolution, we utilized the dual imaging  
162 setup for ATP and caspase-3 activity to PANX1-knock out (KO) HeLa cell lines (PANX1-  
163 KO1 and PANX1-KO2), which were generated using a CRISPR-Cas9 system (Figure  
164 2A). Strikingly, decreases in the intracellular ATP levels of PANX1-KO cells after  
165 caspase-3 activation were significantly slower than those of wild-type HeLa cells when  
166 apoptosis was induced by anti-FAS antibody (Figure 2B-D). Knockout of PANX1  
167 apparently has no effect on the ability of the cells to undergo cell death. A marked  
168 suppression of ATP decrease by knockout of PANX1 was also observed when apoptosis  
169 was induced by staurosporine (Figure 2E, F). Moreover, knockout of PANX1 also  
170 suppressed the decrease in ATP during TRAIL-induced apoptosis of SW480 human  
171 colorectal adenocarcinoma cells (Figure S4). Thus, PANX1 is involved in the facilitation  
172 of intracellular ATP decreases during apoptosis in multiple cell types and on various  
173 apoptotic stimuli. Notably, the intracellular ATP levels of PANX1-KO cells were almost  
174 unchanged in the first 30-60 min after the activation of caspase-3, followed by a gradual  
175 ATP decline (Figure 2C-F, Figure S4). The lag in the cytosolic ATP decrease observed for  
176 PANX1-KO cells might be partially relevant to the previous observation by Zamaraeva  
177 (Zamaraeva et al., 2005), which suggested the enhancement of cytosolic ATP level after  
178 apoptotic stimulation. Single-cell imaging also provided unexpected observations that  
179 intracellular ATP concentration transiently and repeatedly re-elevated on the course of the  
180 gradual ATP decrease in some populations of the PANX1-KO cells (Figure 3). Although  
181 the mechanism for these fluctuations in the intracellular ATP concentrations is unknown  
182 at present, the fluctuations must reflect either fluctuation in the rate of regeneration of  
183 ATP from ADP, that of adenosine nucleotide synthesis through de novo/salvage pathways,  
184 or that of degradation/release of ATP, or a combination thereof.



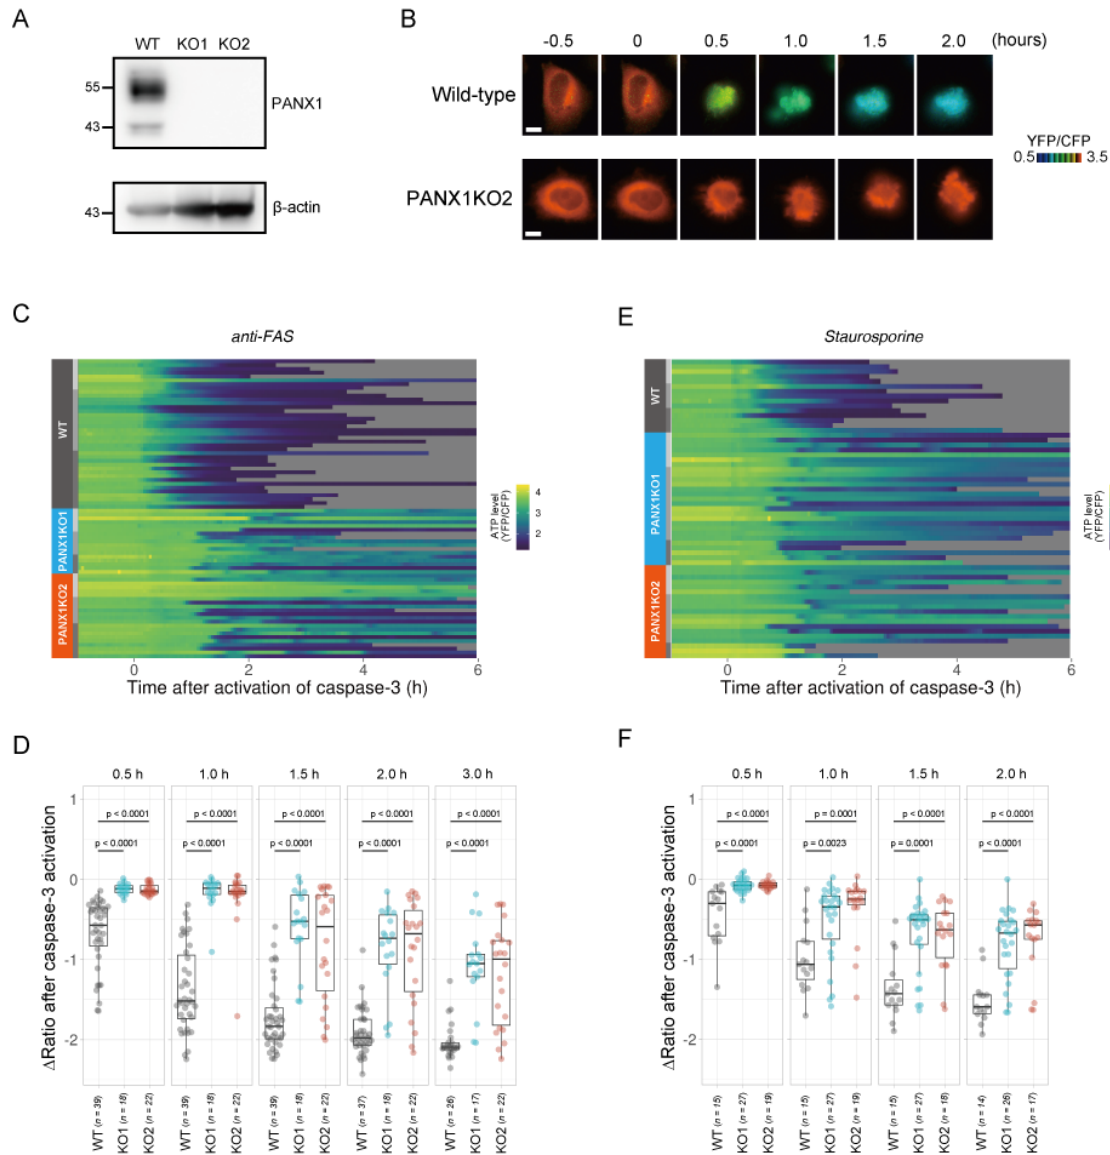

185

186 **Figure 2. Knockout of PANX1 suppresses the cytosolic ATP decrease during apoptotic progression.**

187 (A) Western blot analysis of PANX1 expression of wild-type and PANX1-KO HeLa cells. (B) Time-lapse

188 images of the ATP level of a wild-type cell and a PANX1-KO cell. Pseudocolored ratio images of AT1.03CR

189 are shown. Apoptosis was induced by anti-FAS and cycloheximide. The onset of caspase-3 activation was

190 set as time = 0. Bar, 10  $\mu$ m. (C, E) Single cell ATP dynamics of wild-type and PANX1-KO cells during

191 apoptosis. Apoptosis was induced by anti-FAS and cycloheximide (C; 39 [WT], 18 [PANX1-KO1] and 22

192 [PANX1-KO2] cells from 3 biological replicates), or staurosporine (E; 15 [WT], 27 [PANX1-KO1] and 19

193 [PANX1-KO2] cells from 3 biological replicates). Each line represents the time course of the YFP/CFP

194 ratio of AT1.03CR from a single cell, and was adjusted by setting the onset of caspase-3 activation as time

195 = 0. Traces from different replicates were labeled with bars of different shades. (D, F) Effect of PANX1

196 knockout on the decrease in cytosolic ATP levels. Changes in YFP/CFP ratios at indicated time after the

197 onset of caspase-3 activation were calculated for each apoptotic cell. Apoptosis was induced by anti-FAS  
198 and cycloheximide (D), or staurosporine (F). Analysis of variance (ANOVA) followed by post-hoc  
199 Dunnett's test (versus wild type).  
200

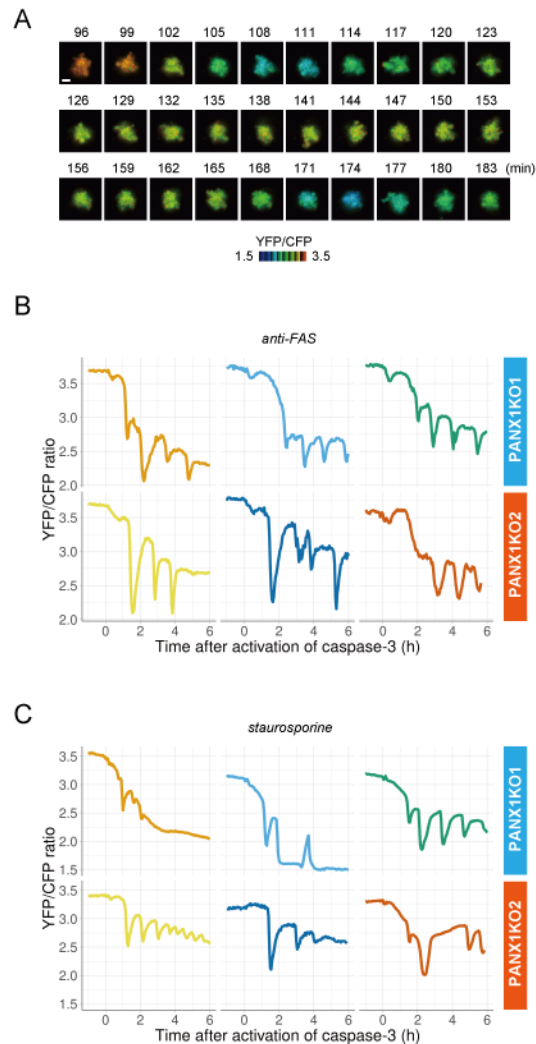

201  
202 **Figure 3. PAXN1 knockout cells show fluctuations of cytosolic ATP levels after the activation of**  
203 **caspase-3.** (A) Fluctuation of cytosolic ATP level of a PAXN1-KO2 cell. Pseudocolored YFP/CFP ratio  
204 images of AT1.03CR are shown. Apoptosis was induced by anti-FAS and cycloheximide. Bar, 10  $\mu$ m. (B,  
205 C) Representative traces of YFP/CFP ratios of AT1.03CR from single PAXN1-KO cells from 3 biological  
206 replicates are shown. Apoptosis was induced by anti-FAS and cycloheximide (B), or staurosporine (C).  
207 Each trace was adjusted by setting the onset of caspase-3 activation as time = 0.

208  
209  
210



211 **Effect of exogenous expression of PANX1 on single-cell dynamics of cytosolic ATP**  
212 **during apoptosis.**

213 Next, we exogenously expressed wild-type PANX1 in PANX1-KO HeLa cells. Cells  
214 overexpressing wild-type PANX1 precipitously lost their intracellular ATP, concomitant  
215 with the onset of caspase-3 activation, for both anti-FAS- and staurosporine-induced  
216 apoptosis (Figure 4A-E), further confirming that the PANX1 channel plays a major role  
217 in facilitating intracellular ATP decrease of apoptotic cells.

218 To examine that the intracellular ATP decrease in apoptotic cells is dependent on caspase-  
219 3 activity, we investigated the intracellular ATP dynamics of single apoptotic wild-type  
220 HeLa cells overexpressing a D376A/D379A mutant of PANX1 (PANX1-CR), in which  
221 the caspase recognition sequence close to the C-terminus of PANX1 is mutated (Chekeni  
222 et al., 2010). When PANX1-CR is overexpressed, most of the intrinsic wild-type PANX1  
223 molecules are predicted to form hetero-heptamer with overexpressed PANX1-CR. The  
224 PANX1 hetero-heptamer will be expected to have much less channel activity than the  
225 wild type PANX1 homo-heptamer as caspase-3 cannot separate the inhibitory C-terminal  
226 region from PANX1-CR inside the hetero-heptamers. In fact, it has been reported that the  
227 overexpression of PANX1-CR significantly suppresses the release of ATP from apoptotic  
228 cells (Chekeni et al., 2010). Accordingly, the intracellular ATP depletion was significantly  
229 protracted by the overexpression of PANX1-CR (Figure 4A and D), clearly indicating that  
230 the cleavage of the C-terminal region of PANX1 by caspases is required for the PANX1-  
231 dependent intracellular ATP decrease of apoptotic cells.

232

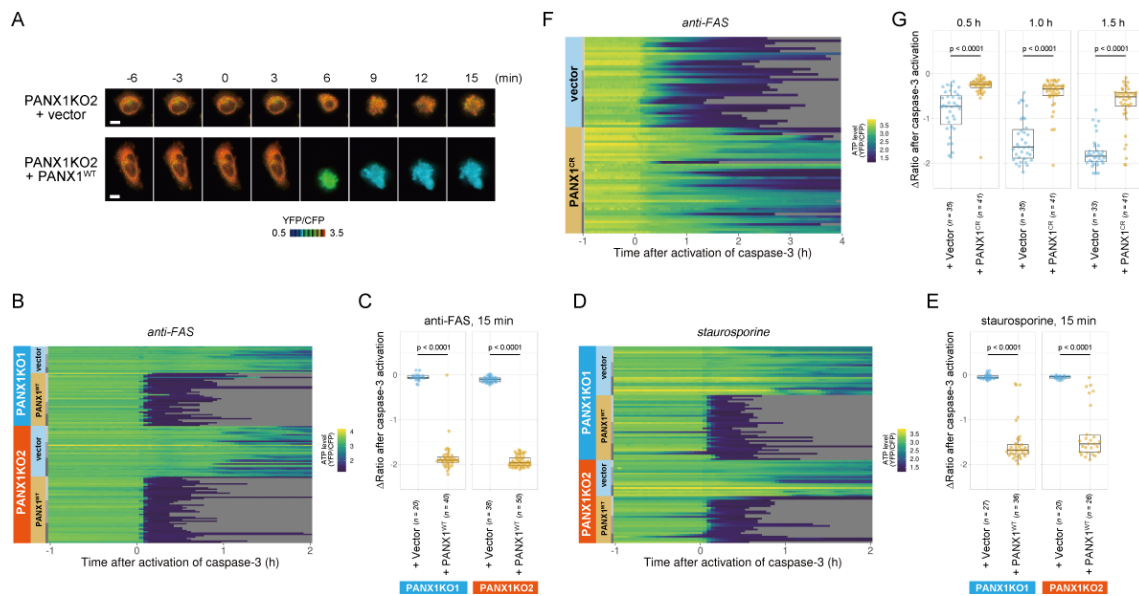

233  
 234 **Figure 4. Exogenous expression of PANX1 alters cytosolic ATP dynamics of apoptotic cells.** (A) Time-  
 235 lapse images of the ATP level of PANX1-KO2 cells. Cells were transfected with either an empty vector  
 236 (upper) or a vector expressing wild-type PANX1 (PANX1<sup>WT</sup>) (lower). Pseudocolored ratio images of  
 237 AT1.03CR are shown. (B, D) Single cell ATP dynamics of PANX1-KO cells expressing exogenous  
 238 PANX1<sup>WT</sup>. Cells were transfected with either an empty vector or a vector expressing PANX1<sup>WT</sup>. Apoptosis  
 239 was induced by either anti-FAS and cycloheximide (B; 20 [PANX1-KO1 + vector], 40 [PANX1-KO1 +  
 240 PANX1<sup>WT</sup>], 38 [PANX1-KO2 + vector] and 50 [PANX1-KO2 + PANX1<sup>WT</sup>] cells from 3 biological  
 241 replicates), or staurosporine (D; 27 [PANX1-KO1 + vector], 36 [PANX1-KO1 + PANX1<sup>WT</sup>], 20 [PANX1-  
 242 KO2 + vector] and 26 [PANX1-KO2 + PANX1<sup>WT</sup>] cells from 3 biological replicates). Each line represents  
 243 the time course of the YFP/CFP ratio of AT1.03CR from a single cell, and was adjusted by setting the onset  
 244 of caspase-3 activation as time = 0. (C, E) Effect of exogenous expression of PANX1<sup>WT</sup> on the decrease in  
 245 cytosolic ATP levels. Changes in YFP/CFP ratios for 15 min after the onset of caspase-3 activation were  
 246 calculated for each apoptotic cell. Apoptosis was induced by anti-FAS and cycloheximide (C), or  
 247 staurosporine (E). Student's t-test. (F) Single cell ATP dynamics of wild-type cells exogenously expressing  
 248 a caspase-resistant mutant of PANX1. Wild-type HeLa cells were transfected with either an empty vector  
 249 or a vector expressing a caspase-resistant mutant of PANX1 (PANX1<sup>CR</sup>). Apoptosis was induced by anti-  
 250 FAS and cycloheximide. Each line represents the time course of the YFP/CFP ratio of AT1.03CR from a  
 251 single cell, and was adjusted by setting the onset of caspase-3 activation as time = 0 (35 [vector] and 41  
 252 [PANX1<sup>CR</sup>] cells from 3 biological replicates). (G) Effect of exogenous expression of PANX1<sup>CR</sup> on the  
 253 decrease in cytosolic ATP levels. Changes in YFP/CFP ratios at indicated time after the onset of caspase-3  
 254 activation were calculated for each apoptotic cell. Apoptosis was induced by anti-FAS and cycloheximide.  
 255 P-values of Student's t-test are shown.

256

257 **Single-cell dynamics of cytosolic ATP during apoptosis under an OXPHOS-**  
258 **dominant culture condition**

259 It is known that cells in normal adult tissues preferentially use oxidative phosphorylation  
260 (OXPHOS) in mitochondria for the regeneration of ATP, while cells in embryonic tissues  
261 and tumors use glycolysis (Vander Heiden et al., 2009). In the experiments described thus  
262 far we used HeLa cells cultured in glucose-containing medium. The cells preferentially  
263 regenerate ATP by glycolysis rather than OXPHOS under these conditions. To examine  
264 the role of PANX1 in apoptosis of OXPHOS-dominant cells, we compared the dynamics  
265 of intracellular ATP in PANX1-KO HeLa cells with those in wild-type cells during  
266 apoptotic progression under an OXPHOS-dominant culture condition. The cytosolic ATP  
267 level after the onset of caspase-3 activation dropped more quickly in the OXPHOS-  
268 dominant condition than in the glycolysis-dependent condition (Figure S5), probably  
269 because mitochondrial membrane potential  $\Delta\Psi_m$ , which is required for mitochondrial ATP  
270 regeneration, is almost lost upon activation of caspase-3 (Figure S6). Even in this  
271 condition, knockout of PANX1 also suppressed the decrease in cytosolic ATP levels of  
272 the cells (Figure S5). This result indicates that PANX1 also promotes the intracellular  
273 ATP reduction of OXPHOS-dominant cells.

274

275 **Extracellular AMP suppresses the decrease in the cytosolic ATP**

276 If efflux of adenine nucleotides through PANX1 channel causes the decrease in the  
277 cytosolic ATP concentrations of apoptotic cells, extracellular adenine nucleotides would  
278 suppress the decrease by counteracting the efflux of its cytosolic counterpart. We  
279 monitored cytosolic ATP dynamics in apoptotic cells in the presence of AMP, ADP or ATP  
280 in the culture medium, and found that extracellular AMP suppressed the decrease in  
281 intracellular ATP levels of apoptotic cells, while extracellular ADP and ATP exhibited no  
282 or negligible effects (Figure 5). Thus, it is most likely that the intracellular ATP decrease  
283 of apoptotic cells is a result of a reduction in adenosine nucleotide pools inside apoptotic  
284 cells, which is caused, at least in part, by the release of AMP from the cells. This result is  
285 consistent with the previous reports that AMP constitutes a large part of adenine  
286 nucleotides released from apoptotic cells (Yamaguchi et al., 2014) (Boyd-Tressler et al.,  
287 2014).

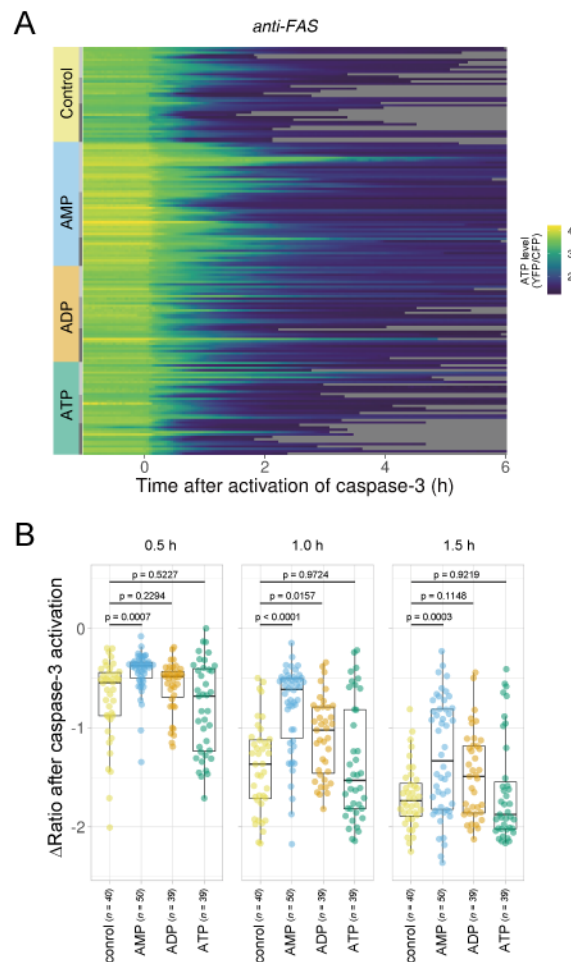

288

289 **Figure 5. Extracellular AMP counteracts the decrease in the cytosolic ATP level of apoptotic cells.**

290 Wild-type HeLa cells expressing AT1.03CR and O-DEVD-FR were imaged in the presence of an adenine

291 nucleotide (1 mM) in the culture medium. Apoptosis was induced by anti-FAS and cycloheximide. (A)

292 Each line represents the YFP/CFP ratio of AT1.03CR from a single apoptotic cell, and was adjusted by

293 setting the onset of caspase-3 activation as time = 0 (40 [control], 50 [AMP], 39 [ADP] and 39 [ATP] cells

294 from 3 biological replicates). (B) Effect of the addition of extracellular nucleotide on the decrease in

295 cytosolic ATP levels. Changes in FRET/CFP ratios at 0.5, 1.0, and 1.5 hours after the caspase-3 activation

296 were calculated for each apoptotic cell. ANOVA followed by post-hoc Dunnett's test (versus control).

297

298 **PANX1 activity regulates free  $Mg^{2+}$  dynamics, but not phosphatidylserine**  
299 **externalization, in apoptotic cells**

300 Next, we investigated whether the PANX1 channel is involved in apoptotic

301 events other than intracellular ATP reduction. First, we examined the  $Mg^{2+}$  dynamics of

302 apoptotic cells.  $Mg^{2+}$  is an essential divalent cation in cells, required for various cellular

303 processes, including the activity of endonucleases and the compaction of chromosomes

304 during cell division (Hartwig, 2001; Maeshima et al., 2018). It is known that most of the  
305 intracellular ATP form a complex with  $Mg^{2+}$ , due to the high affinity of ATP for  $Mg^{2+}$   
306 (Gupta and Moore, 1980) (Grubbs, 2002). Thus, ATP acts as a major intracellular chelator  
307 for  $Mg^{2+}$ . We hypothesized that the PANX1-dependent cytosolic ATP decrease might  
308 affect free  $Mg^{2+}$  in apoptotic cells, and investigated the dynamics of free  $Mg^{2+}$  in single  
309 apoptotic HeLa cells using a  $Mg^{2+}$ -sensing fluorescent probe MGH (Matsui et al., 2017).  
310 In wild-type cells, free  $Mg^{2+}$  was transiently decreased after shrinkage of the cells.  
311 Subsequently, free  $Mg^{2+}$  began to increase and often reached higher than the basal level.  
312 In contrast, the fluctuations in free  $Mg^{2+}$  was significantly suppressed in apoptotic  
313 PANX1-KO cells (Figure S7). Although the cause of the  $Mg^{2+}$  decrease observed  
314 immediately after cell shrinkage is unclear, it might be possible that PANX1 transiently  
315 releases  $Mg^{2+}$  from cytosol to extracellular space. The  $Mg^{2+}$  increase in the second phase  
316 might be coupled with the decrease in ATP, an intracellular  $Mg^{2+}$  chelator. Taken together,  
317 PANX1 regulates the dynamics of free  $Mg^{2+}$  in apoptotic cells, likely in part by decreasing  
318 ATP concentrations inside cells. Second, we examined the role of PANX1 on the  
319 externalization of phosphatidylserine (PS) on plasma membrane, one of the hallmarks of  
320 apoptosis (Elmore, 2016) (Nagata, 2018). Externalized PS functions as an “eat-me”  
321 signal for phagocytosis of apoptotic cells by macrophages. We examined whether PANX1  
322 channel affects the externalization of PS in the plasma membrane by quantifying the  
323 amount of externalized PS using fluorescently-labeled annexin-V. As a result, no  
324 significant difference in the externalized PS was observed between wild-type and  
325 PANX1-KO HeLa cells (Figure S8), suggesting that neither the PANX1-dependent  
326 intracellular ATP reduction or PANX1 itself does not contribute to the externalization of  
327 PS during apoptotic progression.

328

### 329 **PANX1 activation prevents glucose expenditure by apoptotic cells.**

330 We showed above that dying apoptotic cells retained intracellular ATP levels for longer  
331 periods when the PANX1 channel is lost or suppressed. These observations suggest that  
332 an intracellular system for regenerating ATP from ADP and phosphate may still be active  
333 in dying apoptotic cells. In living cells, glycolysis and OXPHOS play prominent roles in  
334 the regeneration of ATP. To examine whether these ATP regenerating pathways are active,  
335 we treated PANX1-KO cells with either an inhibitor for glycolysis or OXPHOS after  
336 activation of caspase-3 while monitoring the dynamics of cytosolic ATP levels (Figure

337 6A-D). We used 2-deoxyglucose (2DG) or sodium oxamate, which are an inhibitor for  
338 hexokinase and lactate dehydrogenase, respectively, to inhibit glycolysis, whereas used  
339 oligomycin A, which is an inhibitor for F<sub>0</sub>F<sub>1</sub>-ATP synthase, to inhibit OXPHOS. Either  
340 treatment with either 2DG or sodium oxamate induced a rapid decrease in intracellular  
341 ATP concentration (Figure 6B, C). In contrast, treatment with oligomycin A, an inhibitor  
342 of OXPHOS, seemed to have only a small effect on intracellular ATP dynamics under this  
343 condition (Figure 6D). These observations indicate that apoptotic processes do not disrupt  
344 the glycolytic system of the cells and that even dying apoptotic cells retain the ability to  
345 regenerate ATP by glycolysis. The rapid decrease in cytosolic ATP concentration of  
346 apoptotic PANX1-KO cells by inhibition of glycolysis also implies that at least some of  
347 the intracellular ATP-utilizing systems are active during apoptosis if sufficient  
348 intracellular ATP is present. It has been previously reported that apoptotic cells treated  
349 with a PANX1 inhibitor showed continuous and extensive blebbing (Poon et al., 2014),  
350 which is dependent on myosin ATPase (Coleman et al., 2001). Consistently, we also  
351 observed that PANX1-KO cells showed more extensive blebbing than wild-type cells  
352 during apoptosis (Supplementary movie 1 and 2). Moreover, forced ATP depletion of  
353 apoptotic PANX1-KO cells by 2DG led to the reduction of the blebbing of the cells  
354 (Supplementary movie 3 and 4). It is also likely that the reduction of ATP during apoptosis  
355 leads to the decrease in the activities of other ATPases because ATPase activity depends  
356 on the concentration of ATP. We expected that if the intracellular ATP concentration of  
357 apoptotic cells is not depleted, the cycle of ATP consumption and regeneration will  
358 continue, resulting in a continuous glucose consumption by the cells. To examine  
359 glycolytic activity in apoptotic cells, we quantified the consumption of glucose and the  
360 release of lactate by wild-type and PANX1-KO HeLa cells after induction of apoptosis.  
361 Both cells exhibited similar glucose consumption and lactate production rates when  
362 apoptosis was not induced (Figure 6E). Glucose consumption and lactate production by  
363 wild-type cells had almost ceased by 16 h after induction of apoptosis, while those by  
364 PANX1-KO cells continued for at least 32 hours when apoptosis was induced by anti-  
365 FAS (Figure 6F). Trends of glucose consumption and lactate production by those cells  
366 were quite similar when apoptosis was induced by ultraviolet (Figure 6G). Thus,  
367 apoptotic cells with deficient PANX1 activity have a prolonged glycolytic activity  
368 compared to normal apoptotic cells. Taken together, activation of PANX1 channels  
369 thwarts glucose expenditure of apoptotic cells, most likely by rapidly depleting



370 intracellular ATP reserves (Figure 7).

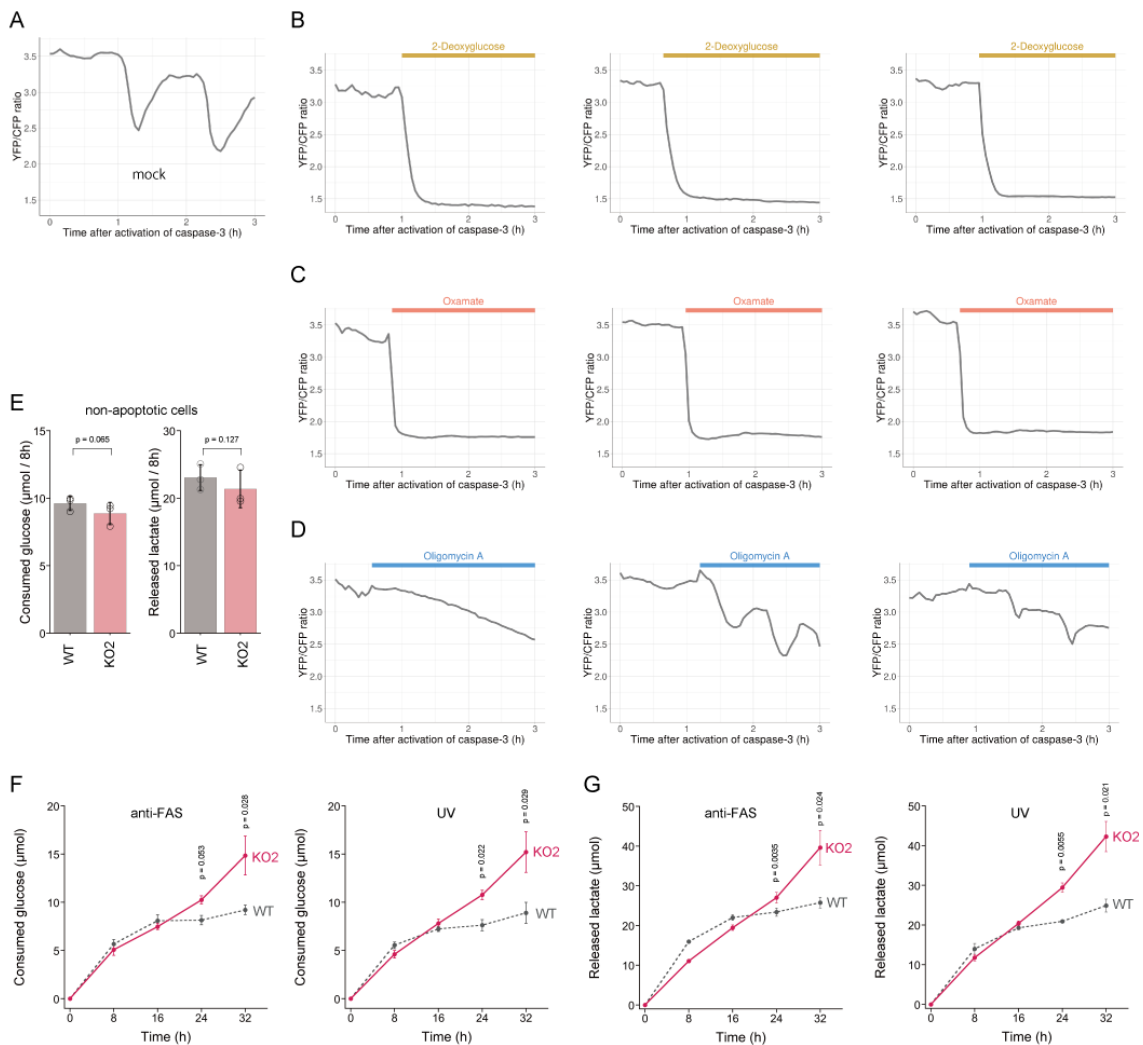

371

372 **Figure 6. PAX1 is required for suppressing consumption of glucose by apoptotic cells.** (A-D) Effect

373 of metabolic inhibitors on cytosolic ATP of apoptotic cells. Apoptosis of PAX1-KO2 cells expressing

374 AT1.03CR and O-DEVD-FR were induced by anti-FAS and cycloheximide. After activation of caspase-3,

375 the cells were untreated (A) or treated either with 10 mM 2-deoxyglucose (B), 50 mM sodium oxamate (C),

376 or 1  $\mu\text{g}/\text{ml}$  oligomycin A. Each trace represents the YFP/CFP ratio of AT1.03CR from a single apoptotic

377 cell, and was adjusted by setting the onset of caspase-3 activation as time = 0. A period of inhibitor treatment

378 was indicated as a bar on each plot. Representative traces from 3 biological replicates are shown. (E)

379 Glycolytic activity of living wild-type and PAX1-KO cells. Consumption of glucose (left) and release of

380 lactate (right) in 8 hours were shown. (F-G) Glycolytic activity of apoptotic cells. Apoptosis was induced

381 either by anti-FAS/cycloheximide (left) or ultraviolet (right) at time = 0. Consumed glucose (F) and released

382 lactate (G) by wild-type HeLa cells (black, dashed line) and PAX1-KO2 cells (red, solid line) were shown.

383 Means  $\pm$  s.d. (3 biological replicates).



384

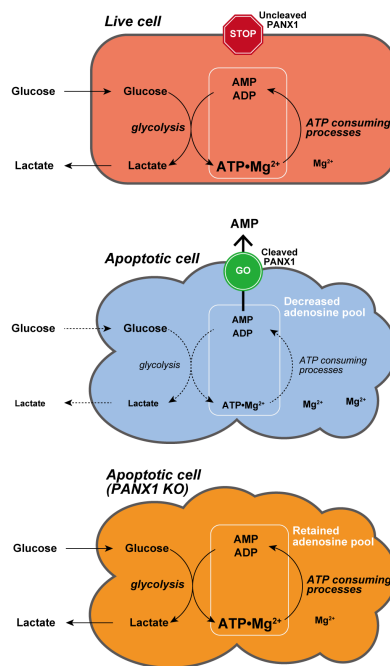

385

386 **Figure 7. Proposed model for PANX1-dependent control of the cytosolic ATP level and glucose**  
387 **consumption of apoptotic cells.**

388

389

390

## Discussion

391

392

393

394

395

396

397

398

399

400

401

402

403

404

In this study, we developed two genetically encoded FRET-based biosensors AT1.03CR and O-DEVD-FR, which enabled dual imaging of both ATP levels and caspase-3 activities during the apoptotic process at the single-cell level. This method allowed us to analyze the single-cell dynamics of cytosolic ATP level after caspase-3 activation, which occurs at different times in different cells. It was clearly shown that the cytosolic ATP level remained almost constant until caspase-3 was activated (Figure 1C, D). We did not observe any profound immediate ATP changes upon induction of apoptosis (Figure S2), in contrast to the previous intracellular ATP analysis from populations of cells using firefly luciferase that has suggested acute ATP production when apoptosis is induced (Zamaraeva et al., 2005). This discrepancy is not clear at present. Once caspase-3 was activated, cytosolic ATP level of the cells started to drop and was typically depleted within 2 hours (Figure 1C, D). Previous studies have shown that sufficient levels of intracellular ATP is required for progression of apoptosis (Eguchi et al., 1997; Hu et al., 1999; Leist et al., 1997; Li et al., 1997; Zamaraeva et al., 2005) and that pre-reduction of

405 intracellular ATP inhibits the activation of caspase-3 (Zamaraeva et al., 2005). Moreover,  
406 apoptosome formation has been shown to require dATP/ATP *in vitro* (Hu et al., 1999;  
407 Li et al., 1997). Taken together, it is likely that maintenance of high intracellular ATP is  
408 critical to activate caspases. Further analysis on cytosolic ATP dynamics demonstrated  
409 that PANX1 channels play a major role in intracellular ATP depletion in apoptotic cells  
410 (Figure 2, 4, S4 and S5). It has been reported that PANX1 releases adenine and uridine  
411 nucleotides upon activation by cleavage of the C-terminal cytosolic region of the protein  
412 by effector caspases (caspase-3 and 7) and that the released nucleotides act as “find-me”  
413 signals for attracting macrophages, which engulf apoptotic cells (Chekeni et al., 2010;  
414 Yamaguchi et al., 2014). In this study, we show that the caspase-dependent cleavage of  
415 PANX1 is also crucial for the intracellular ATP depletion, meaning that intracellular ATP  
416 depletion in apoptotic cells is a “programmed” process rather than a passive phenomenon.  
417 The depletion of intracellular ATP is most likely the result of the decrease in intracellular  
418 adenine nucleotide pool, caused by the release of AMP from the cytosol to the  
419 extracellular space (Figure 7). It should be noted that the intracellular ATP decrease in  
420 apoptotic cells could not be completely stopped by knockout of PANX1 (Figure 2).  
421 Therefore, there must be an additional mechanism of decreasing the intracellular ATP  
422 level in apoptotic cells, which is also likely to contribute to the kinetic variations in  
423 cytosolic ATP reduction among individual apoptotic cells (Figure 2C-F, Figure S4).

424 Metabolism is one of the major biological activity of living systems. The  
425 metabolic activity of cells is an indicator of "the state of being alive". In other words, in  
426 order for a cell to "die a complete death", metabolism must stop. However, it has been not  
427 well understood how metabolism of dead cells cease. Our results showed that PANX1  
428 plays a major role in stopping glycolysis, a central part of metabolism, of apoptotic cells,  
429 most likely through facilitating ATP loss. The suppression of glucose expenditure by  
430 apoptotic cells may benefit surrounding live cells because the resource of glucose for  
431 surrounding live cells would be limited if dying cells continued to consume glucose.  
432 Besides, macrophages that eat apoptotic cells may encounter a risk of energy deprivation  
433 if the eaten cells actively consume glucose inside the macrophages.

434 Because the removal of apoptotic cells by macrophages is critical to suppress  
435 inflammation and autoimmune diseases (Nagata, 2018), stimulating local macrophages  
436 by ATP and related nucleotides released through PANX1 channels should be a  
437 biologically important process in apoptosis (Chekeni et al., 2010). However, it is not clear

438 why apoptotic cells use ATP and related nucleotides as major chemoattractants for  
439 macrophages over others, such as lysophosphatidylcholine (Ousman and David, 2000).  
440 Although it is difficult to say whether the primary function of PANX1 opening in  
441 apoptosis is to deplete intracellular ATP reserves or to release chemoattractant, or both,  
442 one possible scenario may be that cells first developed the function of PANX1 for  
443 depleting intracellular ATP, followed by effective utilization of the released adenine  
444 nucleotides as chemoattractants.

445           How does the intracellular ATP concentration change in other types of cell  
446 death, such as necrosis and pyroptosis? Because a forced decrease of intracellular ATP  
447 levels reportedly switches the cell death fate from apoptosis to necrosis, it is believed that  
448 the intracellular ATP level will decrease in the early stage of necrosis (Eguchi et al., 1997;  
449 Leist et al., 1997; Tsujimoto, 1997). However, a precise investigation of when and how  
450 the intracellular ATP level changes in the necrotic process is still lacking, especially at  
451 single-cell resolution. In pyroptosis, gasdermin-D has been reported to form pores as large  
452 as 10 nm in diameter in the plasma membrane and to release adenine nucleotides (Liu et  
453 al., 2016; Russo et al., 2016). However, it is not clear whether a drop in the intracellular  
454 ATP level coincides with the gasdamin-D pore formation. The techniques used in this  
455 study might be useful for uncovering the mechanism of how ATP decreases in other types  
456 of cell death.

457

458

## Materials and Methods

### 459 Materials

460 Probenecid, oligomycin A, ATP, ADP, and AMP were obtained from Sigma-Aldrich.  
461 Solutions of probenecid, ATP, ADP, and AMP were neutralized with sodium hydroxide  
462 before use. Anti-FAS antibody was from Molecular Biology Laboratory (Nagoya, Japan).  
463 Cycloheximide (CHX) was from Roche. Tetramethylrhodamine ethyl ester (TMRE) and  
464 alexa647-annexin-V were purchased from Molecular Probes. 2-Deoxyglucose were from  
465 Wako Pure Chemicals (Osaka, Japan). Other chemicals were purchased from Nacalai  
466 Tesque (Kyoto, Japan) unless otherwise noted.

467

### 468 Mammalian cell culture and gene knock out

469 The HeLa cell line was a kind gift from Prof. Shin Yonehara, and cells were grown in  
470 Dulbecco's modified Eagle's medium (DMEM, 1 g/L glucose; Nacalai Tesque)

471 supplemented with 10% fetal bovine serum (FBS; Sigma-Aldrich). Apoptosis of the cells  
472 was initiated by adding anti-FAS antibody (125 ng/mL) and CHX (10  $\mu$ M). Knockout of  
473 PANX1 gene was carried out using pre-designed PANX1-KO CRISPR-Cas9 plasmids  
474 (Santa Cruz Biotechnology). Briefly, cells were transfected with CRISPR-Cas9 plasmids  
475 using PEI-Max (Polysciences Inc.) as described previously (Morciano et al., 2020). After  
476 2 days, each individual cell with strong GFP fluorescence was sorted into a well in 96  
477 well plates using a cell sorter (SH800S, Sony), and then was cultured. Knockout of  
478 PANX1 gene in each cultured line was verified by western blotting and by sequencing of  
479 the targeted region of the genomic DNA.

480

#### 481 **Plasmids**

482 The expression vector for the caspase-resistant AT1.03 (pcDNA-AT1.03CR) was  
483 constructed by introducing caspase-resistant mutations (D242N/D339G) into pcDNA-  
484 AT1.03 (Imamura et al., 2009) using PCR-based mutagenesis. O-DEVD-FR cDNA was  
485 constructed by fusing mKO $\kappa$  and mKate2(V94S) through a Gly-Gly-Asp-Glu-Val-Asp-  
486 Gly-Thr linker using PCR. The amplified cDNA was cloned between XhoI and HindIII  
487 sites of pcDNA3.1(-) (Thermo Scientific) to obtain a mammalian expression vector  
488 pcDNA-O-DEVD-FR. Human PANX1 cDNA (Riken Bioresource Center) was amplified  
489 by PCR, and was cloned between XhoI and EcoRI sites of pIRES2-Sirius, a custom made  
490 vector, in which EGFP cDNA of pIRES2-EGFP (Clontech) was replaced by Sirius  
491 fluorescent protein cDNA (Tomosugi et al., 2009), to obtain a pIRES2-Sirius-hPANX1  
492 plasmid. Caspase-resistant mutations (D376A/D379A) in PANX1 were introduced by  
493 PCR-based mutagenesis.

494

#### 495 **Fluorescence imaging of ATP levels and caspase-3 activities**

496 HeLa cells were transfected with the AT1.03CR plasmid and the O-DEVD-FR plasmid  
497 using PEI-Max as described previously (Morciano et al., 2020). For exogenous  
498 expression of PANX1, the plasmid encoding PANX1 cDNA was co-transfected with the  
499 AT1.03CR and the O-DEVD-FR plasmids. One day after transfection, cells were  
500 trypsinized and plated on a collagen-coated glass-bottom 4-compartment dish (0.16 –  
501 0.19 mm thick; Greiner). Two days after transfection, cells cultured in phenol red-free  
502 DMEM supplemented with 10% FBS were subjected to imaging. For OXPHOS-  
503 dependent cell culture, phenol red- and glucose-free DMEM (Gibco) supplemented with

504 10% FBS, 10 mM sodium lactate (Sigma-Aldrich), and 10 mM sodium dichloroacetate  
505 (an inhibitor of pyruvate dehydrogenase kinase, Sigma-Aldrich) was used. Cells were  
506 visualized with a Ti-E inverted microscope (Nikon, Tokyo, Japan) using a Plan Apo 40 $\times$ ,  
507 0.95 numerical aperture, dry objective lens (Nikon). Cells were maintained on a  
508 microscope at 37 °C with a continuous supply of a 95% air and 5% carbon dioxide  
509 mixture by using a stage-top incubator (Tokai Hit). All filters used for fluorescence  
510 imaging were purchased from Semrock (Rochester, NY): for dual-emission ratio imaging  
511 of AT1.03CR, an FF01-438/24 excitation filter, an FF458-Di02 dichroic mirror, and two  
512 emission filters (an FF02-483/32 for CFP and an FF01-542/27 for YFP); dual-emission  
513 ratio imaging of O-DEVD-FR, an FF01-543/22 excitation filter, an FF562-Di02 dichroic  
514 mirror, and two emission filters (an FF01-585/22 for mKOk and an FF01-660/52 for  
515 mKate2). Cells were illuminated using a 75 W xenon lamp through 25% and 12.5%  
516 neutral density filters. Fluorescence emissions from cells were imaged using a Zyla4.2  
517 scientific CMOS camera (Andor Technologies). The microscope system was controlled  
518 by NIS-Elements software (Nikon). Image analysis was performed using MetaMorph  
519 software (Molecular Devices). First, a background fluorescence intensity, which was  
520 measured from a region within image where no cell exist, was subtracted from an entire  
521 image. Next, the intensity of a donor fluorophore (YFP or mKate2) of a cell was divided  
522 by the intensity of an acceptor fluorophore (CFP or mKOk) to obtain the emission ratio.  
523 The detailed method for the image analysis has been described previously (Morciano et  
524 al., 2020). Figures 1A, 2C-F, 3B-C, 4B-G, 5A-B, 6A-D were generated using PlotsOfData  
525 (Postma and Goedhart, 2019) and PlotTwist (Goedhart, 2020).

526

### 527 **Glucose and lactate assay**

528 HeLa cells ( $1.5 \times 10^5$ ) were cultured in 60 mm dish in DMEM (1 g/L glucose)  
529 supplemented with 10% FBS. After 24 hours, the medium was replaced by HBSS.  
530 Subsequently, apoptosis was induced either by replacing the medium with 4 mL of phenol  
531 red-free DMEM (1g/L glucose) supplemented with 10% FBS, 250 ng/mL anti-FAS  
532 antibody and 10  $\mu$ M cycloheximide, or by irradiating the cells with 20 mJ UV-C, followed  
533 by replacing the medium with 4 mL of phenol red-free DMEM (1g/L glucose)  
534 supplemented with 10% FBS. Small aliquots of culture medium from the cell cultures  
535 were sampled at defined intervals. After centrifugation at 3,000 x g for 3 min at 4°C, the  
536 supernatant from each sample was stored at -30 °C until the glucose quantification assay.

537 Glucose and lactate concentrations of the aliquots were determined using Glucose CII-  
538 test Wako (Wako Pure Chemicals, Osaka, Japan) and Lactate Assay Kit-WST (Dojindo,  
539 Kumamoto, Japan), respectively.

540

#### 541 **Western blotting**

542 Protein expression levels of PANX1 were examined by western blotting using a rabbit  
543 monoclonal antibody against human PANX1 (D9M1C, Cell Signaling). Actin was also  
544 detected as a control by western blotting using a mouse monoclonal anti- $\beta$ -actin antibody  
545 (Santa Cruz). Horseradish peroxidase (HRP)-labeled anti-mouse IgG antibody (GE  
546 healthcare) was used as a secondary antibody. Chemi-Lumi One reagent (Nacalai tesque)  
547 was used as a HRP substrate. A LAS4000 imager (GE healthcare) was used to detect the  
548 luminescence.

549

550

#### **Acknowledgements**

551 We thank Shin Yonehara for technical advice and for providing HeLa cells, Hiroyuki Noji,  
552 Takeharu Nagai and Kenta Saito for technical advice, and James Alan Hejna for critical  
553 assessment of this manuscript. The work was supported by JSPS KAKENHI Grant  
554 Number 22687011, 24657101 and 16K14709 (to H.I.), and by the Platform Project for  
555 Supporting Drug Discovery and Life Science Research (Platform for Dynamic  
556 Approaches to Living Systems) from the Ministry of Education, Culture, Sports, Science  
557 and Technology (MEXT) and the Japan Agency for Medical Research and Development  
558 (AMED).

559

560

#### **References**

- 561 Bao, L., Locovei, S., Dahl, G., 2004. Pannexin membrane channels are  
562 mechanosensitive conduits for ATP. *FEBS Lett* 572, 65–68.  
563 doi:10.1016/j.febslet.2004.07.009
- 564 Boyd-Tressler, A., Penuela, S., Laird, D.W., Dubyak, G.R., 2014. Chemotherapeutic  
565 drugs induce ATP release via caspase-gated pannexin-1 channels and a  
566 caspase/pannexin-1-independent mechanism. *J Biol Chem* 289, 27246–27263.  
567 doi:10.1074/jbc.M114.590240

- 568 Chekeni, F.B., Elliott, M.R., Sandilos, J.K., Walk, S.F., Kinchen, J.M., Lazarowski,  
569 E.R., Armstrong, A.J., Penuela, S., Laird, D.W., Salvesen, G.S., Isakson, B.E.,  
570 Bayliss, D.A., Ravichandran, K.S., 2010. Pannexin 1 channels mediate “find-me”  
571 signal release and membrane permeability during apoptosis. *Nature* 467, 863–867.  
572 doi:10.1038/nature09413
- 573 Ciechanover, A., 1994. The ubiquitin-proteasome proteolytic pathway. *Cell* 79, 13–21.  
574 doi:10.1016/0092-8674(94)90396-4
- 575 Coleman, M.L., Sahai, E.A., Yeo, M., Bosch, M., Dewar, A., Olson, M.F., 2001.  
576 Membrane blebbing during apoptosis results from caspase-mediated activation of  
577 ROCK I. *Nature cell biology* 3, 339–345. doi:10.1038/35070009
- 578 Dahl, G., Muller, K.J., 2014. Innexin and pannexin channels and their signaling. *FEBS*  
579 *Lett* 588, 1396–1402. doi:10.1016/j.febslet.2014.03.007
- 580 Deng, Z., He, Z., Maksaev, G., Bitter, R.M., Rau, M., Fitzpatrick, J.A.J., Yuan, P.,  
581 2020. Cryo-EM structures of the ATP release channel pannexin 1. *Nat Struct Mol*  
582 *Biol* 27, 373–381. doi:10.1038/s41594-020-0401-0
- 583 Eguchi, Y., Shimizu, S., Tsujimoto, Y., 1997. Intracellular ATP levels determine cell  
584 death fate by apoptosis or necrosis. *Cancer Res* 57, 1835–1840.
- 585 Elliott, M.R., Chekeni, F.B., Trampont, P.C., Lazarowski, E.R., Kadl, A., Walk, S.F.,  
586 Park, D., Woodson, R.I., Ostankovich, M., Sharma, P., Lysiak, J.J., Harden, T.K.,  
587 Leitinger, N., Ravichandran, K.S., 2009. Nucleotides released by apoptotic cells act  
588 as a find-me signal to promote phagocytic clearance. *Nature* 461, 282–286.  
589 doi:10.1038/nature08296
- 590 Elmore, S., 2016. Apoptosis: A Review of Programmed Cell Death:. *Toxicologic*  
591 *Pathology* 35, 495–516. doi:10.1080/01926230701320337
- 592 Goedhart, J., 2020. PlotTwist: A web app for plotting and annotating continuous data.  
593 *PLoS Biol* 18, e3000581. doi:10.1371/journal.pbio.3000581
- 594 Grubbs, R.D., 2002. Intracellular magnesium and magnesium buffering. *Biometals* 15,  
595 251–259. doi:10.1023/A:1016026831789
- 596 Gupta, R.K., Moore, R.D., 1980. <sup>31</sup>P NMR studies of intracellular free Mg<sup>2+</sup> in intact  
597 frog skeletal muscle. *J Biol Chem* 255, 3987–3993.
- 598 Hartwig, A., 2001. Role of magnesium in genomic stability. *Mutation*  
599 *Research/Fundamental and Molecular Mechanisms of Mutagenesis* 475, 113–121.  
600 doi:10.1016/S0027-5107(01)00074-4



- 601 Hu, Y., Benedict, M.A., Ding, L., Nuñez, G., 1999. Role of cytochrome c and  
602 dATP/ATP hydrolysis in Apaf-1-mediated caspase-9 activation and apoptosis. *The*  
603 *EMBO Journal* 18, 3586–3595. doi:10.1093/emboj/18.13.3586
- 604 Imamura, H., Nhat, K.P.H., Togawa, H., Saito, K., Iino, R., Kato-Yamada, Y., Nagai,  
605 T., Noji, H., 2009. Visualization of ATP levels inside single living cells with  
606 fluorescence resonance energy transfer-based genetically encoded indicators.  
607 *Proceedings of the National Academy of Sciences of the United States of America*  
608 106, 15651–15656. doi:10.1073/pnas.0904764106
- 609 Kaplan, J.H., 2003. *Biochemistry of Na,K-ATPase*.  
610 <http://dx.doi.org/10.1146/annurev.biochem.71.102201.141218> 71, 511–535.  
611 doi:10.1146/annurev.biochem.71.102201.141218
- 612 Kass, G.E., Eriksson, J.E., Weis, M., Orrenius, S., Chow, S.C., 1996. Chromatin  
613 condensation during apoptosis requires ATP. *Biochem J* 318 ( Pt 3), 749–752.
- 614 Leist, M., Single, B., Castoldi, A.F., Kühnle, S., Nicotera, P., 1997. Intracellular  
615 adenosine triphosphate (ATP) concentration: a switch in the decision between  
616 apoptosis and necrosis. *J Exp Med* 185, 1481–1486.
- 617 Li, P., Nijhawan, D., Budihardjo, I., Srinivasula, S.M., Ahmad, M., Alnemri, E.S.,  
618 Wang, X., 1997. Cytochrome c and dATP-dependent formation of Apaf-1/caspase-  
619 9 complex initiates an apoptotic protease cascade. *Cell* 91, 479–489.
- 620 Lundin, A., Thore, A., 1975. Analytical information obtainable by evaluation of the  
621 time course of firefly bioluminescence in the assay of ATP. *Anal Biochem* 66, 47–  
622 63.
- 623 Maeshima, K., Matsuda, T., Shindo, Y., Imamura, H., Tamura, S., Imai, R., Kawakami,  
624 S., Nagashima, R., Soga, T., Noji, H., Oka, K., Nagai, T., 2018. A Transient Rise in  
625 Free Mg<sup>2+</sup> Ions Released from ATP-Mg Hydrolysis Contributes to Mitotic  
626 Chromosome Condensation. *Current Biology* 28, 444–451.e6.  
627 doi:10.1016/j.cub.2017.12.035
- 628 Matsui, Y., Funato, Y., Imamura, H., Miki, H., Mizukami, S., Kikuchi, K., 2017.  
629 Visualization of long-term Mg<sup>2+</sup> dynamics in apoptotic cells using a novel  
630 targetable fluorescent probe. *Chemical Science* 8, 8255–8264.  
631 doi:10.1039/C7SC03954A
- 632 Matsuyama, S., Llopis, J., Deveraux, Q.L., Tsien, R.Y., Reed, J.C., 2000. Changes in  
633 intramitochondrial and cytosolic pH: early events that modulate caspase activation

- 634 during apoptosis. *Nature cell biology* 2, 318–325. doi:10.1038/35014006
- 635 Michalski, K., Syrjanen, J.L., Henze, E., Kumpf, J., Furukawa, H., Kawate, T., 2020.
- 636 The Cryo-EM structure of pannexin 1 reveals unique motifs for ion selection and
- 637 inhibition. *Elife* 9, 213. doi:10.7554/eLife.54670
- 638 Morciano, G., Imamura, H., Patergnani, S., Pedriali, G., Giorgi, C., Pinton, P., 2020.
- 639 Measurement of ATP concentrations in mitochondria of living cells using
- 640 luminescence and fluorescence approaches. *Methods Cell Biol* 155, 199–219.
- 641 doi:10.1016/bs.mcb.2019.10.007
- 642 Nagai, T., Miyawaki, A., 2004. A high-throughput method for development of FRET-
- 643 based indicators for proteolysis. *Biochem Biophys Res Commun* 319, 72–77.
- 644 doi:10.1016/j.bbrc.2004.04.147
- 645 Nagata, S., 2018. Apoptosis and Clearance of Apoptotic Cells. *Annu. Rev. Immunol.*
- 646 36, 489–517. doi:10.1146/annurev-immunol-042617-053010
- 647 Ousman, S.S., David, S., 2000. Lysophosphatidylcholine induces rapid recruitment and
- 648 activation of macrophages in the adult mouse spinal cord. *Glia* 30, 92–104.
- 649 doi:10.1002/(SICI)1098-1136(200003)30:1<92::AID-GLIA10>3.0.CO;2-W
- 650 Panchin, Y., Kelmanson, I., Matz, M., Lukyanov, K., Usman, N., Lukyanov, S., 2000.
- 651 A ubiquitous family of putative gap junction molecules. *Current Biology* 10, R473–
- 652 4.
- 653 Penuela, S., Gehi, R., Laird, D.W., 2013. The biochemistry and function of pannexin
- 654 channels. *Biochim Biophys Acta* 1828, 15–22. doi:10.1016/j.bbamem.2012.01.017
- 655 Poon, I.K.H., Chiu, Y.-H., Armstrong, A.J., Kinchen, J.M., Juncadella, I.J., Bayliss,
- 656 D.A., Ravichandran, K.S., 2014. Unexpected link between an antibiotic, pannexin
- 657 channels and apoptosis. *Nature* 507, 329–334. doi:10.1038/nature13147
- 658 Postma, M., Goedhart, J., 2019. PlotsOfData—A web app for visualizing data together
- 659 with their summaries. *PLoS Biol* 17, e3000202. doi:10.1371/journal.pbio.3000202
- 660 Qu, R., Dong, L., Zhang, J., Yu, X., Wang, L., Zhu, S., 2020. Cryo-EM structure of
- 661 human heptameric Pannexin 1 channel. *Cell Res.* 30, 446–448. doi:10.1038/s41422-020-0298-5
- 662
- 663 Sellevold, O.F., Jynge, P., Aarstad, K., 1986. High performance liquid chromatography:
- 664 a rapid isocratic method for determination of creatine compounds and adenine
- 665 nucleotides in myocardial tissue. *J Mol Cell Cardiol* 18, 517–527.
- 666 Shcherbo, D., Murphy, C.S., Ermakova, G.V., Solovieva, E.A., Chepurnykh, T.V.,

- 667 Shcheglov, A.S., Verkhusha, V.V., Pletnev, V.Z., Hazelwood, K.L., Roche, P.M.,  
668 Lukyanov, S., Zaraisky, A.G., Davidson, M.W., Chudakov, D.M., 2009. Far-red  
669 fluorescent tags for protein imaging in living tissues. *Biochem J* 418, 567–574.  
670 doi:10.1042/BJ20081949
- 671 Tomosugi, W., Matsuda, T., Tani, T., Nemoto, T., Kotera, I., Saito, K., Horikawa, K.,  
672 Nagai, T., 2009. An ultramarine fluorescent protein with increased photostability  
673 and pH insensitivity. *Nat Methods* 6, 351–353. doi:10.1038/nmeth.1317
- 674 Tsujimoto, Y., 1997. Apoptosis and necrosis: intracellular ATP level as a determinant  
675 for cell death modes. *Cell Death Differ* 4, 429–434. doi:10.1038/sj.cdd.4400262
- 676 Tsutsui, H., Karasawa, S., Okamura, Y., Miyawaki, A., 2008. Improving membrane  
677 voltage measurements using FRET with new fluorescent proteins. *Nat Methods* 5,  
678 683–685. doi:10.1038/nmeth.1235
- 679 Vale, R.D., 2003. The molecular motor toolbox for intracellular transport. *Cell* 112,  
680 467–480.
- 681 Vander Heiden, M.G., Cantley, L.C., Thompson, C.B., 2009. Understanding the  
682 Warburg effect: the metabolic requirements of cell proliferation. *Science* 324,  
683 1029–1033. doi:10.1126/science.1160809
- 684 Vignali, M., Hassan, A.H., Neely, K.E., Workman, J.L., 2000. ATP-dependent  
685 chromatin-remodeling complexes. *Mol Cell Biol* 20, 1899–1910.  
686 doi:10.1128/MCB.20.6.1899-1910.2000
- 687 Voet, D., Voet, J.G., 2010. *Biochemistry*, 4th Edition. Wiley Global Education.
- 688 Watabe, T., Terai, K., Sumiyama, K., Matsuda, M., 2020. Booster, a Red-Shifted  
689 Genetically Encoded Förster Resonance Energy Transfer (FRET) Biosensor  
690 Compatible with Cyan Fluorescent Protein/Yellow Fluorescent Protein-Based  
691 FRET Biosensors and Blue Light-Responsive Optogenetic Tools. *ACS Sens* 5,  
692 719–730. doi:10.1021/acssensors.9b01941
- 693 Yamaguchi, H., Maruyama, T., Urade, Y., Nagata, S., 2014. Immunosuppression via  
694 adenosine receptor activation by adenosine monophosphate released from apoptotic  
695 cells. *Elife* 3, e02172. doi:10.7554/eLife.02172
- 696 Zamaraeva, M.V., Sabirov, R.Z., Maeno, E., Ando-Akatsuka, Y., Bessonova, S.V.,  
697 Okada, Y., 2005. Cells die with increased cytosolic ATP during apoptosis: a  
698 bioluminescence study with intracellular luciferase. *Cell Death Differ* 12, 1390–  
699 1397. doi:10.1038/sj.cdd.4401661

700
